1                   **Caterpillars Count! A citizen science project for monitoring**  
2                   **foliage arthropod abundance and phenology**

3  
4   **ABSTRACT**

5   Caterpillars Count! is a citizen science project that allows participants to collect data on the  
6   seasonal timing, or phenology, of foliage arthropods that are important food resources for forest  
7   birds. This project has the potential to address questions about the impacts of climate change on  
8   birds over biogeographic scales. Here, we provide a description of the project's two survey  
9   protocols, evaluate the impact of survey methodology on results, compare findings made by  
10   citizen scientist participants versus trained scientists, and identify the minimum levels of  
11   sampling frequency and intensity in order to accurately capture phenological dynamics. We find  
12   that beat sheet surveys and visual surveys yield similar relative and absolute density estimates of  
13   different arthropod groups, with beat sheet surveys recording a higher frequency of beetles and  
14   visual surveys recording a higher frequency of flies. Citizen scientists generated density  
15   estimates within 6% of estimates obtained by trained scientists regardless of survey method.  
16   However, patterns of phenology were more consistent between citizen scientists and trained  
17   scientists when using beat sheet surveys than visual surveys. By subsampling our survey data, we  
18   found that conducting 30 foliage surveys on a weekly basis led to 95% of peak caterpillar date  
19   estimates to fall within one week of the "true" peak. We demonstrate the utility of Caterpillars  
20   Count! for generating a valuable dataset for ecological research, and call for future studies to  
21   evaluate how training and resource materials impact data quality and participant learning gains.

22   **Keywords:** arthropods, caterpillars, phenology, survey methodology, data validation

23 One of the observed impacts of climate change over recent decades has been a shift in the  
24 seasonal timing, or phenology, of organisms and their life cycles. For example, first flowering  
25 dates in Concord, Massachusetts have advanced by two to three weeks since Thoreau's records  
26 from the 1850s (Ellwood et al., 2013; Primack, 2014). Butterflies have similarly advanced first  
27 flight dates over recent decades (Altermatt, 2012; Forister and Shapiro, 2003), and many bird  
28 species have advanced the timing of migration (Hurlbert and Liang, 2012; Mayor et al., 2017).  
29 Such observed phenological shifts indicate that these species are able to respond to changes in  
30 their physical environment, and yet the magnitude of these shifts is highly variable among  
31 species and across trophic levels (Both et al., 2009; Parmesan, 2007; Parmesan and Yohe, 2003).  
32 Phenological mismatch occurs when organisms fail to adjust phenologically to the same degree  
33 as the organisms on which they depend, and has been documented between plants and their  
34 pollinators (Forrest, 2015), insects and their host plants (Singer and Parmesan, 2010), and birds  
35 and the arthropods they rely on for successfully raising offspring (Visser et al., 2006, 2012).  
36 Understanding phenological mismatch in migratory birds is a particularly challenging problem  
37 because these birds often traverse thousands of kilometers, and climate change is geographically  
38 variable over these regions. As such, observed phenological shifts in the northeastern US, for  
39 example, may have little correlation with phenological shifts in the southeast, and yet whether  
40 these changes are correlated may have important impacts on migratory birds (Fontaine et al.,  
41 2015; Wood and Kellermann, 2015).

42  
43 Citizen science programs are one of the most effective ways to monitor simple biological  
44 phenomena like phenology over broad geographic extents as demonstrated by the recent efforts  
45 by the National Phenology Network (Schwartz et al., 2012), Project Budburst (Johnson, 2016),

46 and eBird (Sullivan et al., 2014). Individual scientists or research groups are simply unable to  
47 collect data efficiently at the relevant spatial and temporal scales for addressing these broad  
48 biogeographical questions. Here we introduce a new citizen science project, *Caterpillars Count!*  
49 (<http://caterpillarscount.unc.edu>), whose aim is to document geographic and annual variation in  
50 the phenology and abundance of arthropods that foliage gleaning birds rely on during the  
51 breeding season. The name of the project highlights the fact that Lepidoptera larvae in particular  
52 represent an important and often primary food source (Holmes et al., 1979; Holmes and Schultz,  
53 1988; Jones et al., 2003; Sillett et al., 2000) known to influence avian density (Graber and  
54 Graber, 1983), reproductive success (Rodenhouse and Holmes, 1992; Visser et al., 2006), clutch  
55 size (Perrins, 1991) and number of broods raised (Nagy and Holmes, 2005a, 2005b). The  
56 enlistment of citizen scientists would potentially allow for an examination of phenological  
57 mismatch between birds and their food resources at an unprecedented scale.

58  
59 Our aims in this paper are to 1) describe the survey protocols used to monitor foliage arthropods,  
60 2) evaluate the impact of survey methodology on results, 3) compare findings made by citizen  
61 scientist participants versus trained scientists to assess the reliability of citizen science data  
62 collection and to make recommendations for citizen science coordinators, and 4) identify the  
63 minimum levels of sampling frequency and intensity in order to accurately capture phenological  
64 dynamics. It is our hope that *Caterpillars Count!* will yield robust data on arthropod phenology  
65 over broad spatial scales that can ultimately be leveraged with other existing datasets to provide  
66 new insights into potential mismatches between vegetation, arthropods, and birds.

67

68 ***Caterpillars Count! Protocol***

69 Because arthropods may be patchily distributed across an area, accurate estimates of density  
70 require conducting many surveys per survey date. Permanent survey locations are arrayed across  
71 the study site in groups (“circles”) of five, with a central survey branch identified  
72 opportunistically (e.g., a branch with lots of additional suitable vegetation nearby) followed  
73 ideally by the first suitable branch 5 m away in each of the four cardinal directions (Figure 1,  
74 inset). To be suitable, a branch must have at least 50 leaves (or leaflets for compound leaves)  
75 each greater than 5 cm in length. Participating sites may have anywhere from 20 to 60 surveys  
76 arranged in 4 to 12 circles across the study site.

77

### 78 *Visual foliage survey*

79 Visual foliage surveys conducted at ground level have been used for decades to characterize  
80 foliage arthropod availability to birds throughout the forest canopy (Holmes and Schultz, 1988).

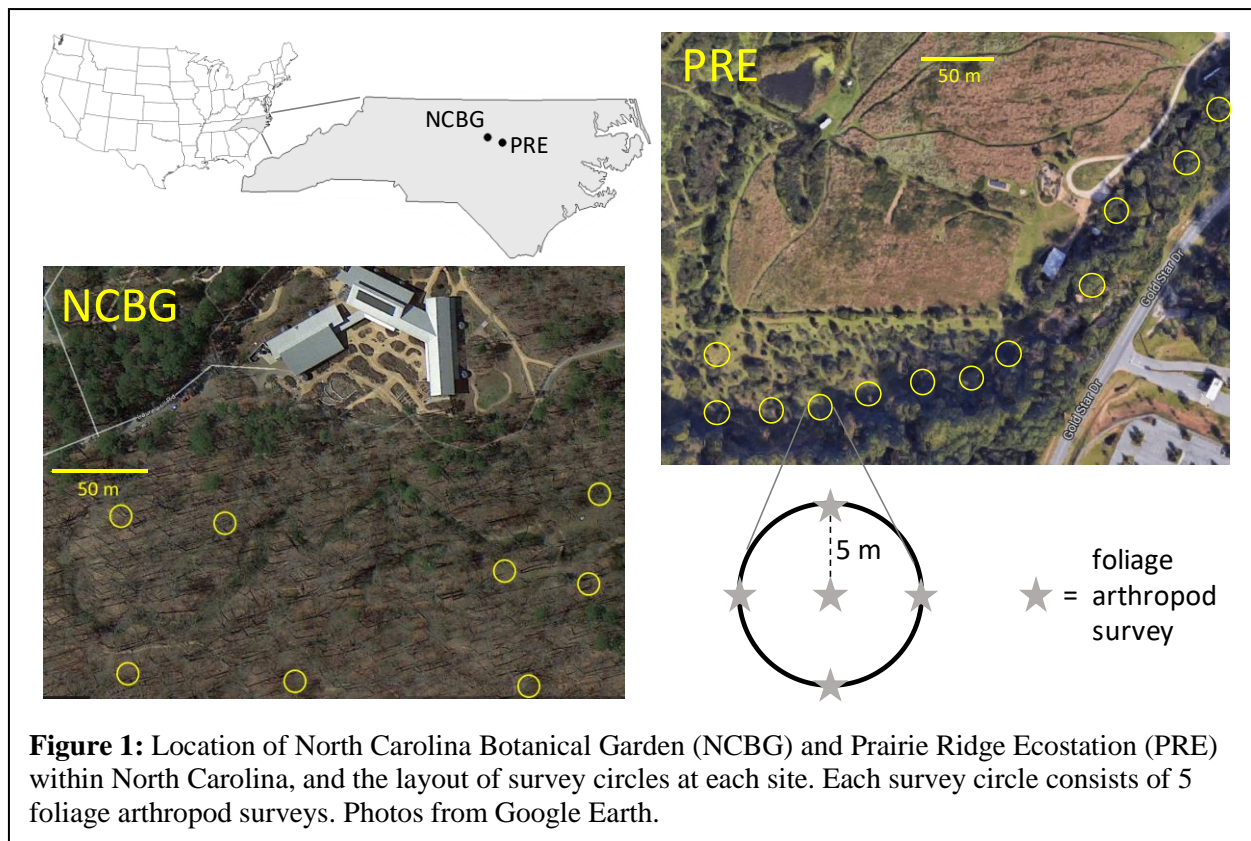

81 For one survey, an observer examines both the upper- and undersides of 50 leaves and associated  
 82 petioles and twigs on a branch of woody vegetation typically 1-2 m above the ground. All  
 83 arthropods observed greater than 2 mm in length are identified, generally to order (but in some  
 84 cases suborder or family; Table 1), and their body length (not including legs or antennae) is  
 85 recorded to the nearest millimeter. Arthropods smaller than 2 mm are ignored both because of  
 86 their lesser importance as food items as well as the increased difficulty and therefore time  
 87 required for identification. A single visual foliage survey takes 2-6 minutes depending upon the  
 88 density of arthropods, experience of the observer, and degree of clustering of leaves on a branch.

89  
 90 **Table 1.** Common arthropod groups found on foliage that citizen scientist participants are  
 91 expected to be able to identify.

| Common name            | Scientific name                    | Taxonomic level           | Distinguishing features                                                                                                                  |
|------------------------|------------------------------------|---------------------------|------------------------------------------------------------------------------------------------------------------------------------------|
| Ants                   | Formicidae                         | Family                    | Narrow waist, no wings; elbowed antennae                                                                                                 |
| Aphids and psyllids    | Sternorrhyncha                     | Suborder, Order Hemiptera | Small (just a few mm); aphids are pear-shaped                                                                                            |
| Bees and wasps         | Hymenoptera (excluding Formicidae) | Order                     | 2 pairs of wings with the hindwings smaller than the frontwings; wasps have narrow waists but bees do not                                |
| Beetles                | Coleoptera                         | Order                     | A straight line down the back where the two hard wing casings (elytra) meet                                                              |
| Caterpillars           | Lepidoptera (larvae)               | Order                     | Soft, cylindrical body with 6 legs and up to 5 pairs of prolegs                                                                          |
| Daddy longlegs         | Opiliones                          | Order                     | 8 very long legs; they appear to have a single oval-shaped body                                                                          |
| Flies                  | Diptera                            | Order                     | A single pair of wings                                                                                                                   |
| Grasshoppers, Crickets | Orthoptera                         | Order                     | Usually with enlarged hind legs for jumping                                                                                              |
| Leafhoppers, Cicadas   | Auchenorrhyncha                    | Suborder, Order Hemiptera | Usually a wide head relative to the body; hoppers have wings folded tentlike over their back, while cicadas have large membranous wings. |
| Moths, Butterflies     | Lepidoptera (adults)               | Order                     | 4 large wings covered by fine scales                                                                                                     |
| Spiders                | Araneae                            | Order                     | 8 legs, with two distinct body segments: the cephalothorax and abdomen                                                                   |
| True Bugs              | Heteroptera                        | Suborder, Order Hemiptera | Semi-transparent wings which partially overlap creating a triangle or X shape on the back; often has pointy "shoulders"                  |

93 *Beat sheet survey*

94 As an alternative to the visual foliage survey, participants may choose instead to conduct a beat  
95 sheet survey in which the survey branch is beat with a stick ten times in rapid succession over a  
96 white 60 x 60 cm sheet. As with the visual survey, all arthropods are identified to the relevant  
97 order/group (Table 1) and length is recorded to the nearest millimeter. In addition, the participant  
98 records the total number of leaves that were positioned above the beat sheet during beating  
99 which is expected to vary from branch to branch. A single beat sheet survey typically takes 2-3  
100 minutes depending on the density of arthropods and experience of observer.

101

102 **Methods**

103 *Data collection*

104 Foliage arthropod surveys were conducted at two locations within the North Carolina Piedmont  
105 region. The North Carolina Botanical Garden site (NCBG; 35.898550° N, 79.031642° W) is a  
106 natural deciduous forest in Chapel Hill, NC featuring a canopy dominated by *Fagus grandifolia*  
107 and *Acer sacharrum* with an understory of *Lindera benzoin* and *Carpinus caroliniana*. Prairie  
108 Ridge Ecostation (PRE; 35.8117° N, 78.7139° W) is an outdoor nature center in Raleigh, NC  
109 featuring a narrow forest strip (including *Liquidambar styraciflua*, *Acer negundo*, *Diospyros*  
110 *virginiana*) alongside an open prairie. Forty survey locations were established at NCBG and 60  
111 at PRE (Figure 1).

112

113 In both 2015 and 2016, members of the Hurlbert Lab at the University of North Carolina  
114 (hereafter “trained scientists”) conducted visual and beat sheet surveys twice per week from mid-  
115 May through July at all survey locations within NCBG and PRE. Hurlbert provided extensive

116 training before and during foliage survey activities, ensuring that team members were capable of  
117 documenting potentially cryptic arthropods and of identifying arthropods to the relevant groups.  
118 Visual surveys were conducted first at each survey location followed by a beat sheet survey on  
119 an adjacent branch of the same plant species. Surveys were typically conducted between 0830  
120 and 1200 hrs. At PRE in 2015, trained scientists additionally conducted beat sheet surveys once  
121 per week on Thursday afternoons, typically between 1300 and 1400, at a fixed subset of 40 of  
122 the 60 total survey locations.

123  
124 In both 2015 and 2016, volunteers (hereafter “citizen scientists”) were recruited to conduct  
125 foliage arthropod surveys at PRE at the fixed subset of 40 survey locations. Citizen scientists  
126 were recruited through the volunteer program at the North Carolina Museum of Natural Sciences  
127 and included both men and women varying in age from 22 to 50 years in age. Volunteers were  
128 trained by CLG, who worked with the volunteers the first three times they conducted surveys and  
129 focused heavily on arthropod identification skill building. After the third survey, the volunteers  
130 conducted the surveys on their own. In 2015, seven different citizen scientists conducted visual  
131 foliage surveys, some on Thursdays between 1300 and 1500 and others on Saturdays between  
132 0900 and 1100 hours most weeks. In 2016, four citizen scientists were recruited, and conducted  
133 beat sheet surveys once per week on average, typically between 0800 and 1200 hrs. We were  
134 thus able to compare citizen scientist and trained scientist observations based on visual surveys  
135 in 2015 and based on beat sheet surveys in 2016. An average citizen scientist conducted 140-280  
136 surveys over the course of each season, while each trained scientist typically conducted 900-  
137 1400 surveys per season and so had more experience on top of the increased training and  
138 supervision.

139  
140 Finally, while our survey methodology focuses on foliage 1-2 m above ground for logistical  
141 reasons, we would ideally like to make inferences about arthropod phenology throughout the  
142 entire canopy. In order to validate this comparison between foliage strata, we collected  
143 caterpillar frass falling from the canopy at both sites in 2015 to compare with observed  
144 phenology from the ground level foliage surveys. Frass traps consisted of a 20 cm diameter  
145 plastic funnel mounted onto a garden stake 30 cm above ground level and lined with a 40 cm  
146 diameter piece of filter paper folded into a cone. Each frass trap samples a cross-sectional area of  
147 1662 cm<sup>2</sup>. Frass traps were located within existing survey circles (1 trap per circle at PRE, 2 per  
148 circle at NCBG) such that they spanned the same locations as the arthropod surveys. Although  
149 frass traps were collected and reset every 3-4 days, data were unusable on dates where there had  
150 been major rainstorms since the traps were deployed.

151  
152 *Data analysis*

153 Although participants recorded observations of all arthropods at least 2 mm in length, we only  
154 used observations of arthropods 5 mm long or longer in analyses. This reduces the incidence of  
155 misidentification of very small individuals, and also minimizes the effect of error in estimating  
156 the 2 mm cutoff. Using visual foliage survey data from trained scientists we calculated the  
157 average density per 50-leaf survey of each arthropod group by tree species.

158  
159 Comparisons of relative arthropod composition between survey methods and between survey  
160 participant groups was conducted using chi-squared analyses, while comparisons of absolute



161 density (number observed per survey) across all arthropod groups were conducted using  
162 Pearson's correlation coefficients.  
163  
164 Phenology was characterized by the fraction of surveys (occurrence) on which a focal arthropod  
165 group was detected on a given date. We used occurrence rather than mean density estimates  
166 because the latter are sensitive to outliers, and we had a few instances in which a large number of  
167 gregarious caterpillars were observed in a single survey. Because citizen scientists typically  
168 collected data only once per week, we averaged the bi-weekly samples of trained scientists into  
169 weekly estimates in order to visually compare phenology and calculate Pearson's correlation  
170 coefficients across weeks.

171  
172 In order to assess the impact of sampling intensity and sampling frequency on estimates of peak  
173 caterpillar phenology date, we used data from Prairie Ridge in 2015 where trained scientists  
174 conducted 60 beat sheet surveys twice per week from mid-May through mid-July. We fit a  
175 Gaussian curve to these data (excluding the last two dates in July which reflect a late season peak  
176 less relevant for the avian breeding season; see Figure 3a below) and assumed the estimated  
177 mean of this curve reflected the "true" peak date (julian day 172). We then randomly subsampled  
178 the full dataset by manipulating both the number of surveys examined per sampling date (10, 20,  
179 30, 40, 50, or 60 out of the 60 surveys) and the sampling frequency (every sampling date used,  
180 every other, every third, every fourth, and every fifth). For each combination of survey number  
181 and sampling frequency we conducted 60 replicate subsamples evenly split across potential  
182 starting dates (i.e., if sampling frequency was set at every other sampling date, we subsampled  
183 using the 1st, 3rd, 5th, etc. dates, but as another replicate also the 2nd, 4th, 6th, etc.). We

184 estimated the peak date from Gaussian fits to the subsampled data. Fits were only used if the  
185 mean date was between julian days 100 and 200, and if the  $R^2$  for the fit was  $>0.2$  (89% of all  
186 fits).

187

## 188 **Results**

### 189 *Relative and absolute density*

190 Visual foliage arthropod surveys revealed differences in the total density and composition of  
191 arthropods supported by different tree species (Figure 2a). Of the tree species with at least 300  
192 surveys each, sweetgum (*Liquidambar styraciflua*) supported the highest arthropod density while  
193 sugar maple (*Acer saccharum*) had the lowest. Sweetgum and American beech (*Fagus*  
194 *grandifolia*) supported the greatest densities of caterpillars (0.14 and 0.17 caterpillars per survey,  
195 respectively, excluding one sweetgum survey with a colony of 250 fall webworm (*Hyphantria*  
196 *cunea*) caterpillars), although nearly all of the caterpillars on American beech were hidden  
197 between two leaves sewn together and so potentially inaccessible to birds.

198

199 Relative and absolute density estimates for each arthropod group also depended upon survey  
200 method (Figure 2b,c;  $\chi^2 = 284.73$ ,  $df = 6$ ,  $p < 10^{-16}$ ). Beat sheet surveys revealed a greater  
201 proportion of Coleoptera (beetles) and a lower proportion of Diptera (flies) compared to visual  
202 surveys. A comparison of absolute densities reveals the same discrepancy with respect to the rate  
203 at which beetles and flies are observed using the two methods, but also illustrates that density  
204 estimates are comparable for most other arthropod groups ( $r = 0.82$ ,  $p = 0.0004$ ). Notably,  
205 caterpillar density estimates were similar using both methods (0.077 versus 0.083  
206 caterpillars/survey for beat sheet and visual surveys, respectively).

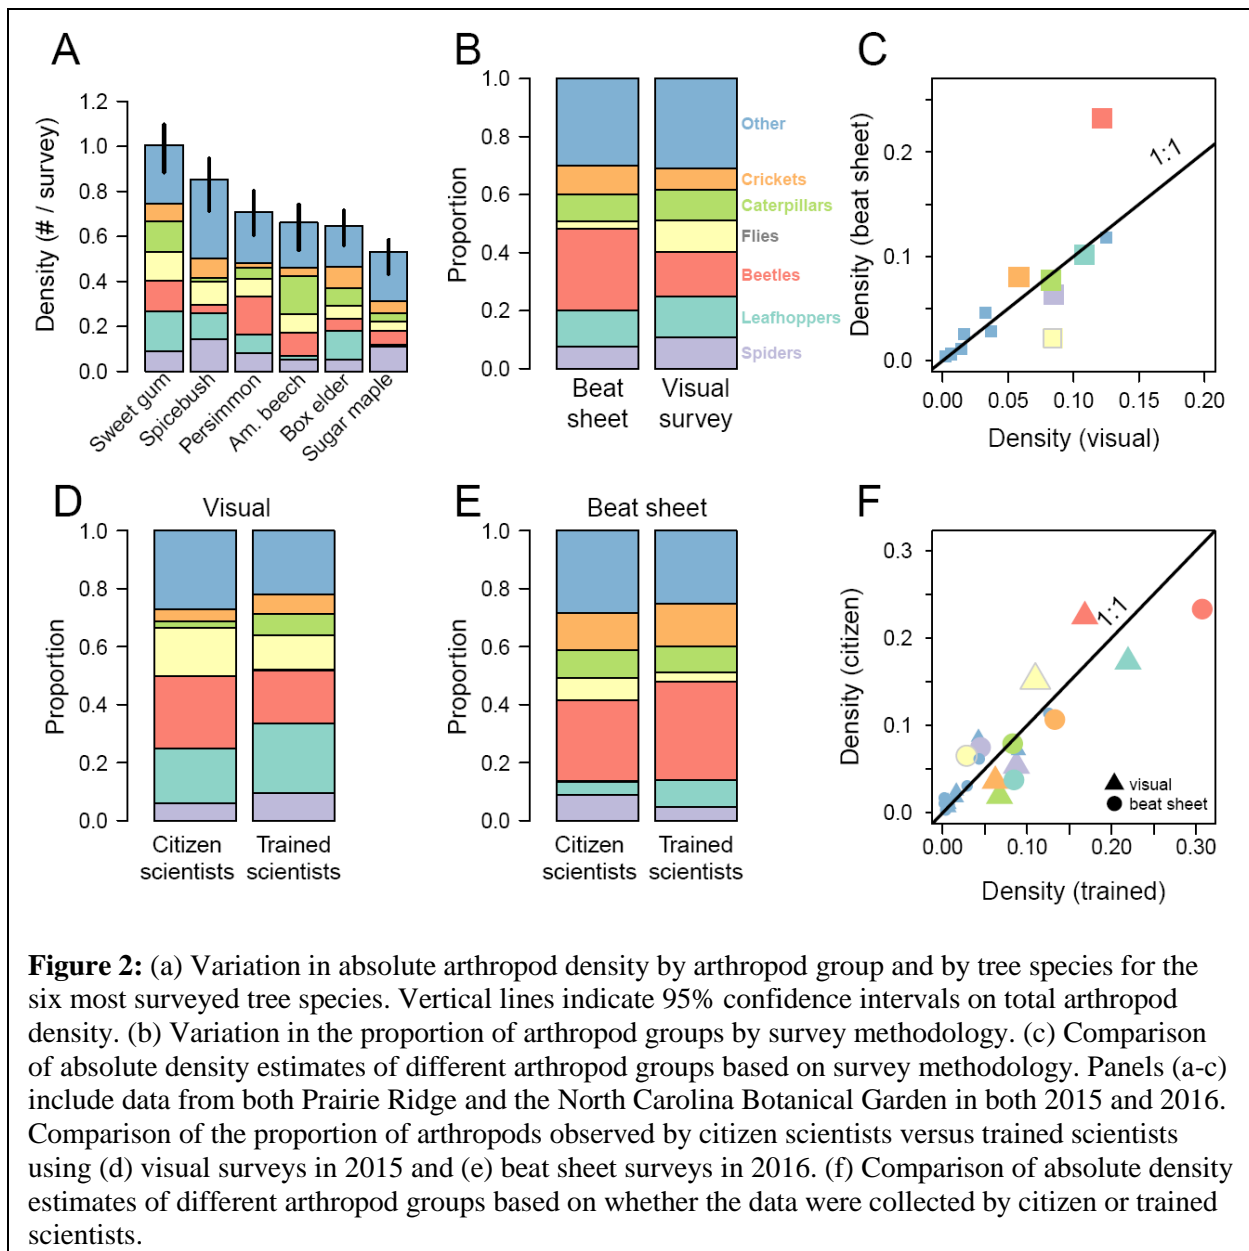

207

208 Perceived arthropod composition differed between citizen scientist and trained scientist

209 conducted visual surveys (Figure 2d,  $\chi^2 = 44.94$ ,  $df = 6$ ,  $p < 5e10^{-8}$ ). Citizen scientists reported a

210 greater proportion of flies and beetles and a smaller proportion of Auchenorrhyncha

211 (leafhoppers, planthoppers, etc.), Orthoptera (grasshoppers and crickets), and caterpillars

212 compared to the trained scientists, however all differences were within +/- 6%. Absolute density

213 estimates across arthropod taxa were positively correlated between the two groups (Figure 2f,  
214 triangles,  $r = 0.84$ ,  $p < 0.0002$ ), and although citizen scientists overestimated fly and beetle  
215 density and underestimated caterpillar density relative to trained scientists, these differences  
216 were all within 0.05 arthropods/survey.

217  
218 Using beat sheet surveys, the difference between citizen scientists and trained scientists was less  
219 pronounced (Figure 2e,  $\chi^2 = 18.34$ ,  $df = 6$ ,  $p = 0.005$ ), with citizen scientists reporting a slightly  
220 greater proportion of Diptera and Araneae and a slightly lower proportion of Auchenorrhyncha  
221 and Coleoptera relative to trained scientists. Again, all differences were within +/- 6%. Absolute  
222 density estimates were even more strongly correlated across arthropod taxa between the two  
223 groups than in the visual survey comparison (Figure 2f, circles,  $r = 0.94$ ,  $p < 0.0001$ ). There was  
224 much better congruence in estimates of caterpillar and Orthopteran density in particular using  
225 beat sheet surveys compared to visual surveys.

226

### 227 *Phenology*

228 A primary goal of the *Caterpillars Count!* project is to characterize the seasonal fluctuations in  
229 arthropods over the spring and summer. The phenology of caterpillars as captured by visual and  
230 beat sheet surveys near ground level mirrored the phenology of frass falling from the canopy at  
231 PRE (Figure 3a), with less obvious concordance at the NCBG (Figure 3b), although fewer frass  
232 data points were available at the latter site.

233

234

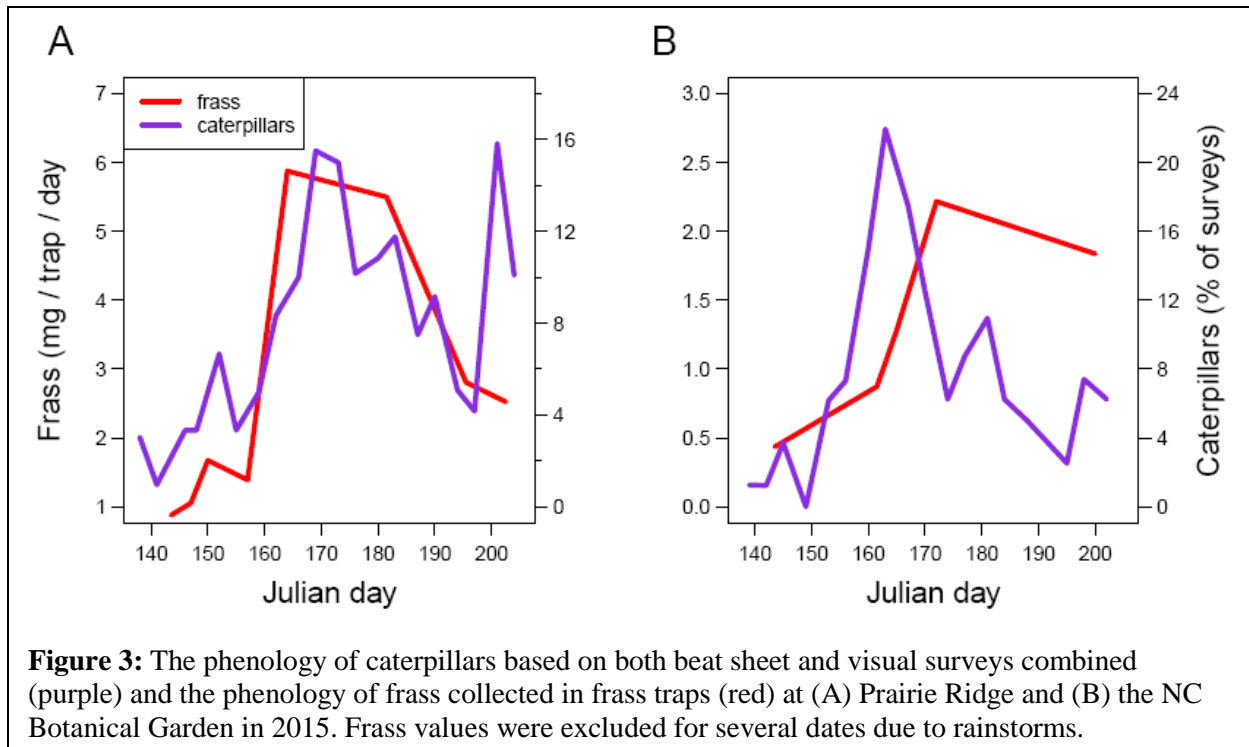

235 As expected, arthropods like caterpillars and orthopterans that depend on leaves for food and  
236 shelter exhibited low densities in early spring and then increased over the summer (Figure 4a-d,  
237 purple lines). Orthopterans continued to increase through mid- to late-July, while caterpillars  
238 exhibited a peak in occurrence in mid-June, followed by another in early July. Foliage arthropods  
239 in aggregate (caterpillars, orthopterans, beetles, spiders, leafhoppers, and true bugs) exhibit a  
240 general positive trend over the dates examined, with less pronounced seasonal peaks due to the  
241 more consistent occurrence of some of those other groups like spiders.

242

243 In 2015 using visual surveys, citizen scientists underestimated the occurrence of foliage  
244 arthropods early in the season relative to trained scientists, but estimates converged later in the  
245 season (Figure 4a, c, e). Citizen scientists did not observe many caterpillars at all until July. As  
246 such, they missed the peak in caterpillar occurrence documented by trained scientists in mid-  
247 June, although their observations of a decline in mid-July and subsequent recovery in late July

248 were generally consistent (Figure 4a). Similarly, citizen scientists in 2015 also missed the late  
249 June peak in orthopterans but captured the peak in July (Figure 4c).  
250  
251 In 2016, using beat sheet surveys, the phenology recorded by citizen scientists was much more  
252 strongly correlated with trained scientist observations ( $0.50 < r < 0.95$ ; Figure 4b, d, f). In

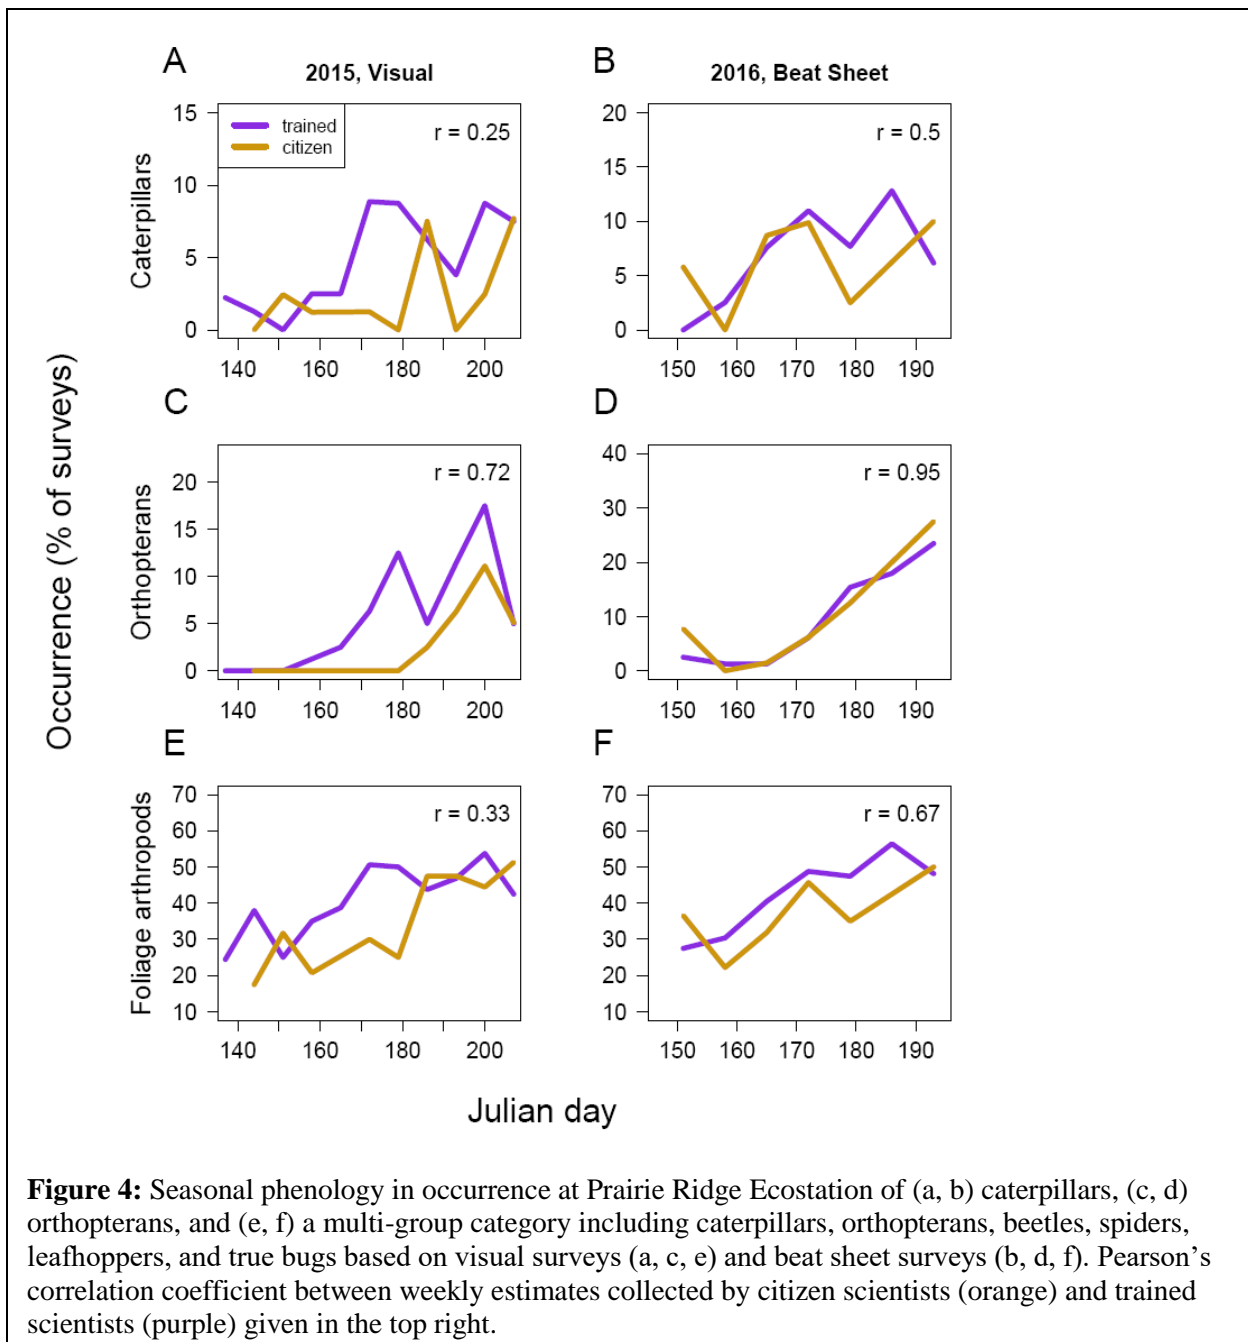

253 particular, citizen scientists identified the same increase and mid-June peak in caterpillar  
254 occurrence as trained scientists. Citizen scientists did not actually conduct surveys the week of  
255 Julian day 186 when trained scientists identified a second seasonal peak in caterpillars.

256

### 257 *Sampling effort*

258 Estimates of peak caterpillar date were unbiased with respect to the "true" value (Julian day 172)  
259 even at low sampling intensity or frequency (Figure 5). However, as expected, 95% confidence  
260 intervals around the estimated value were tightest when conducting many surveys at high  
261 frequency, or with a low sampling interval. Estimates of peak caterpillar date based on only a  
262 small number of surveys or a low frequency of sampling resulted in estimates that were often  
263 weeks from the "true" value. In this particular dataset, sampling 30 surveys on a weekly basis led  
264 to 95% of estimated peak dates falling within one week of the true date. Increasing the number of  
265 surveys conducted per sampling date typically yielded a greater increase in accuracy of the peak  
266 date estimate compared to increasing the sampling frequency (Figure 5). For example, doubling  
267 the number of weekly surveys from 20 to 40 reduced the confidence interval width by more than  
268 50% (19 days to 9), compared to conducting 20 surveys at double the frequency (19 days to 12).

269

### 270 **Discussion**

271 Foliage arthropod surveys have the potential to shed light on an important and understudied  
272 aspect of ecosystem phenology. However, phenology is expected to vary dramatically between  
273 regions (Both et al., 2004; Hurlbert and Liang, 2012) and even across local land use gradients  
274 (Diamond et al., 2014; White et al., 2002), necessitating the collection of phenology data across  
275 broad geographic scales. Here, we have demonstrated the potential of enlisting citizen scientists

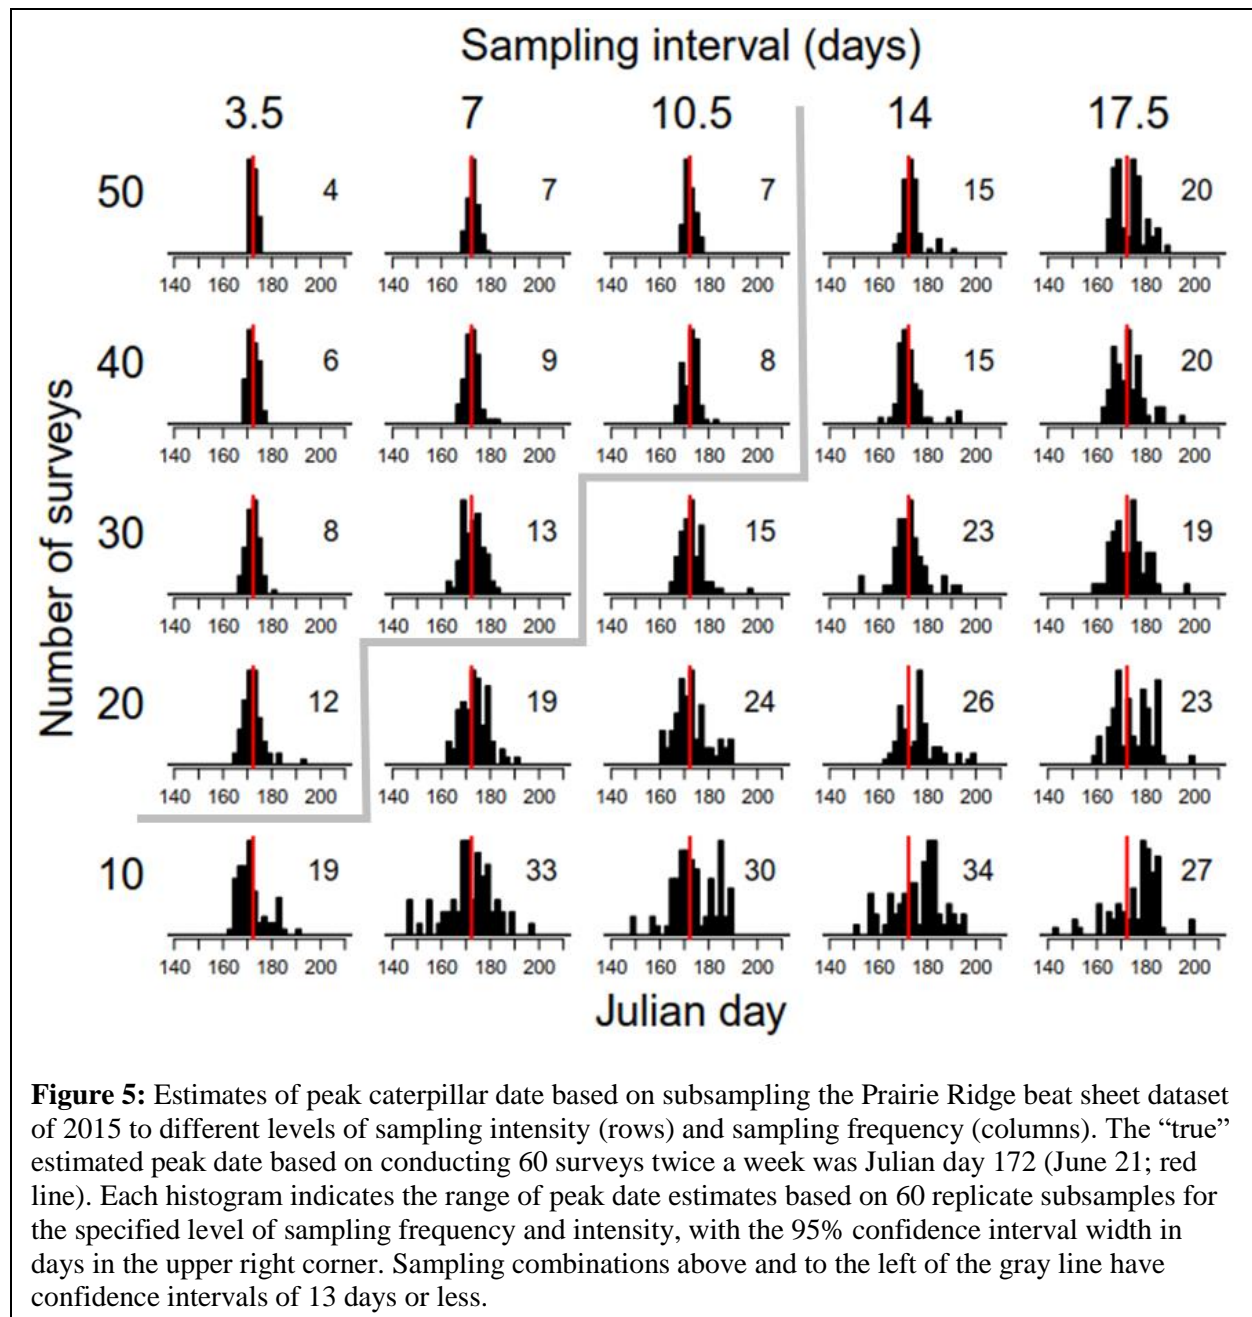

276 to collect such data, which could greatly facilitate broad-scale investigations into the wide-  
 277 ranging impacts of climate change on natural systems. In particular, such data would allow  
 278 researchers to better interpret the consequences of observed phenological shifts by birds which  
 279 depend on those arthropod resources (Hurlbert, 2016; Hurlbert and Liang, 2012; Mayor et al.,  
 280 2017), and shifts by trees and shrubs on which those arthropods depend (Polgar and Primack,



281 2011; Singer and Parmesan, 2010). These data would also provide a monitoring baseline for  
282 assessing arthropod abundance into the future in light of dramatic population declines reported  
283 for many groups from across the globe (Dirzo et al., 2014; Hallmann et al., 2017). These  
284 preliminary results help inform the best practices for the *Caterpillars Count!* survey scheme that  
285 will allow researchers to robustly identify patterns of foliage arthropod density in time and space.

286

### 287 *Phenology at ground level versus the canopy*

288 We found a striking concordance between our ground level survey-based estimates of caterpillar  
289 phenology and the canopy level frass-based phenology at Prairie Ridge, suggesting that foliage  
290 arthropod surveys conducted near ground level can be used to assess the phenology of higher  
291 vegetation strata as well. This correspondence in phenology is consistent with other studies that  
292 have found a correlation between lower and upper canopy caterpillar density across trees, years,  
293 and season (Cooper, 1988; Holmes and Schultz, 1988). Agreement between caterpillar  
294 phenology and frass phenology was weaker at the NC Botanical Garden, with caterpillar density  
295 at ground level peaking earlier than frass. In studies where a difference in phenology between  
296 strata has been observed, typically it is the canopy that peaks before the understory, when  
297 caterpillars migrate down to pupate on the forest floor later in the season (Aikens et al., 2013;  
298 Murakami, 2002). The disagreement we observed may instead be due in part to the fact that a  
299 large fraction (>70%) of the caterpillars observed at the Botanical Garden occurred in leaf  
300 shelters which prevented frass from dropping. In addition, 20% of the survey branches at the  
301 Botanical Garden were of the understory shrub spicebush (*Lindera benzoin*) that was not  
302 represented at all in the canopy from which frass was being sampled. Monitoring frass  
303 phenology at sites where the *Caterpillars Count!* project is implemented will continue to

304 improve our understanding of where and when phenology varies across forest strata, and in some  
305 cases could form the basis for a complementary citizen science project.

306

307 *Implications for survey methods and sampling scheme*

308 We evaluated two methods for conducting foliage arthropod surveys, visual surveys and beat  
309 sheet surveys. In general, the two survey methods yielded very similar results with respect to  
310 relative and absolute estimates of arthropod group density based on data collected by trained  
311 scientists. As expected, however, each method had its own biases. Flies (Diptera) were  
312 underrepresented on beat sheet surveys compared to visual surveys as they tended to fly  
313 immediately up and away as soon as a branch was first struck. In contrast, beetles (Coleoptera)  
314 were more numerous in beat sheet surveys than visual surveys. Many of the beetles observed in  
315 beat sheets were narrow brownish ‘click’ beetles (family Elateridae) which rest flat along twigs.  
316 This comparison suggests observers may frequently be overlooking these beetles in visual  
317 surveys, although they are quite obvious when lying in a beat sheet. Density estimates for most  
318 other groups, including caterpillars, were similar using the two methods. This is interesting given  
319 anecdotal observations that some caterpillars, especially those in leaf rolls or sewn between two  
320 leaves, are not dislodged by beating, while caterpillars that are extremely cryptic in appearance  
321 are more likely to be missed in visual surveys. Although these two groups seemed to be of  
322 equivalent abundance such that our two density estimates were comparable, this may not always  
323 be the case. Researchers using these data specifically for density estimates will certainly want to  
324 take survey method and associated biases into account during analysis, however, phenological  
325 metrics of timing which rely on relative, not absolute, indices of abundance should be unbiased.

326

327 Beat sheet surveys yielded stronger agreement between citizen scientists and trained scientists  
328 with respect to density estimates and phenology compared to visual surveys. This was especially  
329 true for caterpillars: in 2015 citizen scientists entirely missed the mid-June peak in caterpillar  
330 occurrence when conducting visual surveys, while the citizen scientists in 2016 documented  
331 patterns similar to the trained scientists using beat sheet surveys. The individual citizen scientist  
332 participants differed between 2015 and 2016, indicating that this effect is just as likely to be a  
333 participant effect as a survey method effect. Anecdotally, one participant in 2015 was notably  
334 less engaged and motivated compared to participants in 2016, highlighting the need to further  
335 validate the use of visual surveys in this project. Certainly, not all participants would necessarily  
336 have missed the caterpillar peak in 2015. Nevertheless, the ideal methodology is one that is  
337 robust to variation in participant ability and motivation. The task of detecting arthropods against  
338 a white beat sheet is presumably less subject to error than that of detecting arthropods on an  
339 often similarly colored branch, and thus we encourage participants to use beat sheets if possible.

340  
341 Another advantage of beat sheet surveys in the context of citizen science is the ability to engage  
342 and involve younger participants. Although children are not the target participant group for this  
343 project, beat sheet surveys require considerably less time and patience than visual surveys, and  
344 may be better for youth education programs. Beat sheets are also useful for displaying interesting  
345 arthropods to a group, providing an unobstructed view and avoiding the need to have them step  
346 up to a branch one at a time. Although constructing a homemade beat sheet is fairly simple and  
347 cheap (~\$5 in fabric and hardware), it still represents a potential barrier for participants or  
348 environmental education centers with limited resources. For that reason alone, we expect that  
349 some will choose to conduct visual surveys. Our comparison of the two methods provides an

350 initial suggestion of how to compare data obtained in each, but conducting this methods  
351 comparison in other habitats and regions would be useful. Importantly, density estimates of  
352 citizen scientists were within 6% of estimates by trained scientists for both survey methods  
353 suggesting that either method can yield data useful for addressing research questions.  
354  
355 Finally, we examined how variation in sampling intensity and frequency influenced the  
356 perceived date of peak caterpillar occurrence. This is an important question because citizen  
357 scientist participants have finite time and resources to dedicate to any particular project, and  
358 while estimates of phenology become more precise with increased data collection, the number of  
359 participants willing to meet those increased data collection requirements will be smaller  
360 (Sauermann and Franzoni, 2015). We found that conducting 30 foliage surveys on a weekly basis  
361 provided estimates of peak caterpillar occurrence typically within 1 week of the “true” peak, and  
362 recommend this level of effort as a best practice. If a greater sampling effort is possible,  
363 increasing the number of surveys conducted per sampling date yields a greater increase in  
364 precision compared to investing an equivalent amount of effort in increased sampling frequency  
365 and so should be preferred. A smaller number of surveys may still be useful in assessing  
366 phenology in a qualitative sense (e.g. determining whether it’s an “early” or “late” year), and we  
367 will more rigorously evaluate this possibility as we accumulate more years of survey data.  
368  
369 Because a single foliage survey by an untrained individual conservatively takes about 6 minutes  
370 (including sharing observations with others, walking between surveys, etc.), our recommended  
371 effort (30 surveys) requires 3 person-hours per week. While some dedicated and interested  
372 individuals may participate at this level, they will be in the minority. For this reason, *Caterpillars*

373 *Count!* will be most easily carried out at centralized locations like environmental education  
374 centers that frequently host thousands of visitors each season and have groups of dedicated,  
375 regular volunteers eager to contribute toward projects at the site. At centers like these, the data  
376 collection effort can be divided up among several people such that, for example, a group of 5  
377 could conduct 30 surveys in less than forty minutes. In this way, individuals interested in  
378 participating for only a single day may still contribute to the project within a discrete amount of  
379 time and with the assistance of trained and experienced participants. This distributed effort  
380 strategy still requires one individual at the site who can coordinate the efforts of other  
381 participants, and our experience at Prairie Ridge Ecostation suggests this will require 2 hours per  
382 week once the project is up and running.

383

#### 384 *Sources of error and bias*

385 Data collection for this project involves three potential sources of error in the context of  
386 phenology estimation. First, participants must detect arthropods on survey branches or beat  
387 sheets. As discussed above, detectability is expected to be a greater problem for visual surveys  
388 due to crypsis, although detectability on beat sheets may still be an issue for arthropods that fly,  
389 jump, or run out of the sheet before they can be observed. Nevertheless, for detectability to bias  
390 phenological signal, it must vary systematically over time. This may be less of an issue for beat  
391 sheet surveys, however, the ability to detect insects on branches via visual surveys almost  
392 certainly increases with experience. For sites at which the same individual or individuals conduct  
393 visual surveys each week, one might expect observations in the first few survey periods to  
394 underestimate arthropod occurrence relative to later in the season. Quantifying exactly how  
395 arthropod searching ability improves over time will help determine whether this bias is mostly

396 eliminated after a single day of conducting 5-10 surveys, or if it is likely to persist over a longer  
397 period. Nevertheless, to the extent that seasonal arthropods decline in late summer (e.g. July for  
398 caterpillars at our study sites), this phenomenon should be well captured by observers regardless  
399 of any increases in searching competence.

400

401 Second, participants must properly identify arthropods to the appropriate group (Table 1). For  
402 groups like caterpillars and spiders, this task will be straightforward. Distinguishing beetles from  
403 true bugs and leafhoppers may be more prone to error. We have developed outreach materials  
404 including identification keys and cheatsheets to assist participants while they are in the field. We  
405 have also developed an arthropod photo identification quiz which is on our website  
406 (<http://caterpillarscount.unc.edu/quiz/>). The quiz may be taken repeatedly with different photos  
407 of common foliage arthropods each time, and scores are stored in an internal database by user.  
408 Thus, we are able to quantitatively assess the ability of participants to identify the focal taxa. The  
409 quiz could thus be used both to filter observations from unreliable users, but also to document  
410 any increases in identification ability over time. Finally, when conducting surveys via the mobile  
411 app, users may optionally photograph the arthropods they encounter, and these photographs get  
412 automatically submitted to the crowdsourcing identification website iNaturalist.org. This feature  
413 allows those who are interested to pursue lower taxonomic level identification by experts.

414

415 Third, participants must estimate the body length of arthropods to the nearest millimeter.

416 Although much of the US public is less familiar with metric units, having participants calibrate  
417 familiar objects like the width of a fingernail or a pencil is fairly straightforward and simple  
418 rulers can be drawn on the supports of a beat sheet, or included in the mobile app and arthropod

419 identification guides. Regardless, errors in length estimation will not impact phenology patterns  
420 based on occurrence or density. Even in the event that arthropod lengths are used to calculate  
421 biomass phenology via length-weight regressions, length estimates are not expected to be biased  
422 seasonally in one direction or the other.

423

#### 424 *Incentives for participation*

425 Robust survey protocols are necessary but insufficient for ensuring a citizen science project's  
426 success. Equally important are considerations about the motivations and incentives for  
427 participating (Hobbs and White, 2012), both from the perspective of potential one-time  
428 contributors like weekend visitors to an environmental education center, as well as new potential  
429 site coordinators and their regular volunteers. *Caterpillars Count!* provides a context for  
430 interested individuals to learn about the natural world around them and to contribute to a broader  
431 scientific understanding of arthropod phenology and its consequences in a changing world. The  
432 project also provides participants who have affinities to particular *Caterpillars Count!* sites the  
433 ability to contribute to something meaningful at that site. We hope the availability of arthropod  
434 identification resources, mobile apps for easy data collection, data visualization tools on the  
435 project website, and structured learning activities associated with the project will provide  
436 additional incentives for environmental educators and others to initiate a *Caterpillars Count!*  
437 monitoring scheme.

438

#### 439 **Acknowledgements**

440 We would like to thank all of the citizen science participants, especially T. Wilkins and R. Ward,  
441 and Hurlbert Lab members that have helped collect data for this project, as well as the

442 environmental educators and others that have provided feedback on protocols, mobile apps, and  
443 activities.

444

## 445 **References**

446 Aikens, K.R., Timms, L.L., Buddle, C.M., 2013. Vertical heterogeneity in predation pressure in a  
447 temperate forest canopy. *PeerJ* 1. <https://doi.org/10.7717/peerj.138>

448 Altermatt, F., 2012. Temperature-related shifts in butterfly phenology depend on the habitat.

449 *Glob. Change Biol.* 18, 2429–2438. <https://doi.org/10.1111/j.1365-2486.2012.02727.x>

450 Both, C., Artemyev, A.V., Blaauw, B., Cowie, R.J., Dekhuijzen, A.J., Eeva, T., Enemar, A.,

451 Gustafsson, L., Ivankina, E.V., Järvinen, A., Metcalfe, N.B., Nyholm, N.E.I., Potti, J.,

452 Ravussin, P.-A., Sanz, J.J., Silverin, B., Slater, F.M., Sokolov, L.V., Török, J., Winkel,

453 W., Wright, J., Zang, H., Visser, M.E., 2004. Large-scale geographical variation confirms

454 that climate change causes birds to lay earlier. *Proc. R. Soc. Lond. Ser. B-Biol. Sci.* 271,

455 1657–1662.

456 Both, C., Van Asch, M., Bijlsma, R.G., Van Den Burg, A.B., Visser, M.E., 2009. Climate change

457 and unequal phenological changes across four trophic levels: constraints or adaptations?

458 *J. Anim. Ecol.* 78, 73–83. <https://doi.org/10.1111/j.1365-2656.2008.01458.x>

459 Cooper, R.J., 1988. Dietary relationships among insectivorous birds of an eastern deciduous

460 forest (Ph.D.). West Virginia University, Morgantown, WV.

461 Diamond, S.E., Cayton, H., Wepprich, T., Jenkins, C.N., Dunn, R.R., Haddad, N.M., Ries, L.,

462 2014. Unexpected phenological responses of butterflies to the interaction of urbanization

463 and geographic temperature. *Ecology*. <https://doi.org/10.1890/13-1848.1>



- 464 Dirzo, R., Young, H.S., Galetti, M., Ceballos, G., Isaac, N.J.B., Collen, B., 2014. Defaunation in  
465 the Anthropocene. *Science* 345, 401–406. <https://doi.org/10.1126/science.1251817>
- 466 Ellwood, E.R., Temple, S.A., Primack, R.B., Bradley, N.L., Davis, C.C., 2013. Record-Breaking  
467 Early Flowering in the Eastern United States. *PLOS ONE* 8, e53788.  
468 <https://doi.org/10.1371/journal.pone.0053788>
- 469 Fontaine, J., Stutzman, R., Gannes, L., 2015. Leaps, Chains, and Climate Change for Western  
470 Migratory Songbirds, in: *Phenological Synchrony and Bird Migration, Studies in Avian*  
471 *Biology*. CRC Press, pp. 3–16. <https://doi.org/10.1201/b18011-3>
- 472 Forister, M.L., Shapiro, A.M., 2003. Climatic trends and advancing spring flight of butterflies in  
473 lowland California. *Glob. Change Biol.* 9, 1130–1135. [https://doi.org/10.1046/j.1365-](https://doi.org/10.1046/j.1365-2486.2003.00643.x)  
474 [2486.2003.00643.x](https://doi.org/10.1046/j.1365-2486.2003.00643.x)
- 475 Forrest, J.R.K., 2015. Plant–pollinator interactions and phenological change: what can we learn  
476 about climate impacts from experiments and observations? *Oikos* 124, 4–13.  
477 <https://doi.org/10.1111/oik.01386>
- 478 Graber, J.W., Graber, R.R., 1983. Feeding rates of warblers in spring. *The Condor* 85, 139–150.
- 479 Hallmann, C.A., Sorg, M., Jongejans, E., Siepel, H., Hofland, N., Schwan, H., Stenmans, W.,  
480 Müller, A., Sumser, H., Hörren, T., Goulson, D., Kroon, H. de, 2017. More than 75  
481 percent decline over 27 years in total flying insect biomass in protected areas. *PLOS*  
482 *ONE* 12, e0185809. <https://doi.org/10.1371/journal.pone.0185809>
- 483 Hobbs, S.J., White, P.C.L., 2012. Motivations and barriers in relation to community participation  
484 in biodiversity recording. *J. Nat. Conserv.* 20, 364–373.  
485 <https://doi.org/10.1016/j.jnc.2012.08.002>

- 486 Holmes, R.T., Bonney, R.E., Pacala, S.W., 1979. Guild structure of the Hubbard Brook bird  
487 community: a multivariate approach. *Ecology* 60, 512–520.
- 488 Holmes, R.T., Schultz, J.C., 1988. Food availability for forest birds: effects of prey distribution  
489 and abundance on bird foraging. *Can. J. Zool.* 66, 720–728.
- 490 Hurlbert, A.H., 2016. Birds are shifting migration timing, but how, why, and is it enough?  
491 *Ecology* 97, 2171–2172. <https://doi.org/10.1002/ecy.1509>
- 492 Hurlbert, A.H., Liang, Z., 2012. Spatiotemporal Variation in Avian Migration Phenology:  
493 Citizen Science Reveals Effects of Climate Change. *PLoS ONE* 7, e31662.  
494 <https://doi.org/10.1371/journal.pone.0031662>
- 495 Johnson, K.A., 2016. Real Life Science with Dandelions and Project BudBurst. *J. Microbiol.*  
496 *Biol. Educ.* 17, 115–116. <https://doi.org/10.1128/jmbe.v17i1.1064>
- 497 Jones, J., Doran, P.J., Holmes, R.T., 2003. Climate and Food Synchronize Regional Forest Bird  
498 Abundances. *Ecology* 84, 3024–3032. <https://doi.org/10.2307/3449971>
- 499 Mayor, S.J., Guralnick, R.P., Tingley, M.W., Otegui, J., Withey, J.C., Elmendorf, S.C., Andrew,  
500 M.E., Leyk, S., Pearse, I.S., Schneider, D.C., 2017. Increasing phenological asynchrony  
501 between spring green-up and arrival of migratory birds. *Sci. Rep.* 7, 1902.  
502 <https://doi.org/10.1038/s41598-017-02045-z>
- 503 Murakami, M., 2002. Foraging mode shifts of four insectivorous bird species under temporally  
504 varying resource distribution in a Japanese deciduous forest. *Ornithol. Sci.* 1, 63–69.  
505 <https://doi.org/10.2326/osj.1.63>
- 506 Nagy, L.R., Holmes, R.T., 2005a. Food limits annual fecundity of a migratory songbird: an  
507 experimental study. *Ecology* 86, 675–681. <https://doi.org/10.1890/04-0155>

- 508 Nagy, L.R., Holmes, R.T., 2005b. To Double-Brood or Not? Individual Variation in the  
509 Reproductive Effort in Black-Throated Blue Warblers (*Dendroica caerulescens*) (¿Poner  
510 Nidadas Dobles o No? Variación Individual en el Esfuerzo Reproductivo en *Dendroica*  
511 *caerulescens*). *The Auk* 122, 902–914.
- 512 Parmesan, C., 2007. Influences of species, latitudes and methodologies on estimates of  
513 phenological response to global warming. *Glob. Change Biol.* 13, 1860–1872.  
514 <https://doi.org/10.1111/j.1365-2486.2007.01404.x>
- 515 Parmesan, C., Yohe, G., 2003. A globally coherent fingerprint of climate change impacts across  
516 natural systems. *Nature* 421, 37–42. <https://doi.org/10.1038/nature01286>
- 517 Perrins, C.M., 1991. Tits and their caterpillar food supply. *Ibis* 133, 49–54.  
518 <https://doi.org/10.1111/j.1474-919X.1991.tb07668.x>
- 519 Polgar, C.A., Primack, R.B., 2011. Leaf-out phenology of temperate woody plants: from trees to  
520 ecosystems. *New Phytol.* 191, 926–941. [https://doi.org/10.1111/j.1469-](https://doi.org/10.1111/j.1469-8137.2011.03803.x)  
521 [8137.2011.03803.x](https://doi.org/10.1111/j.1469-8137.2011.03803.x)
- 522 Primack, R.B., 2014. *Walden Warming: Climate change comes to Thoreau’s woods*. University  
523 of Chicago Press, Chicago.
- 524 Rodenhouse, N.L., Holmes, R.T., 1992. Results of experimental and natural food reductions for  
525 breeding Black-throated Blue Warblers. *Ecology* 73, 357–372.
- 526 Sauermann, H., Franzoni, C., 2015. Crowd science user contribution patterns and their  
527 implications. *Proc. Natl. Acad. Sci.* 112, 679–684.  
528 <https://doi.org/10.1073/pnas.1408907112>
- 529 Schwartz, M.D., Betancourt, J.L., Weltzin, J.F., 2012. From Caprio’s lilacs to the USA National  
530 Phenology Network. *Front. Ecol. Environ.* 10, 324–327. <https://doi.org/10.1890/110281>

- 531 Sillett, T.S., Holmes, R.T., Sherry, T.W., 2000. Impacts of a global climate cycle on population  
532 dynamics of a migratory songbird. *Science* 288, 2040–2042.  
533 <https://doi.org/10.1126/science.288.5473.2040>
- 534 Singer, M.C., Parmesan, C., 2010. Phenological asynchrony between herbivorous insects and  
535 their hosts: signal of climate change or pre-existing adaptive strategy? *Philos. Trans. R.  
536 Soc. B Biol. Sci.* 365, 3161–3176. <https://doi.org/10.1098/rstb.2010.0144>
- 537 Sullivan, B.L., Aycrigg, J.L., Barry, J.H., Bonney, R.E., Bruns, N., Cooper, C.B., Damoulas, T.,  
538 Dhondt, A.A., Dietterich, T., Farnsworth, A., Fink, D., Fitzpatrick, J.W., Fredericks, T.,  
539 Gerbracht, J., Gomes, C., Hochachka, W.M., Iliff, M.J., Lagoze, C., La Sorte, F.A.,  
540 Merrifield, M., Morris, W., Phillips, T.B., Reynolds, M., Rodewald, A.D., Rosenberg,  
541 K.V., Trautmann, N.M., Wiggins, A., Winkler, D.W., Wong, W.-K., Wood, C.L., Yu, J.,  
542 Kelling, S., 2014. The eBird enterprise: An integrated approach to development and  
543 application of citizen science. *Biol. Conserv.* 169, 31–40.  
544 <https://doi.org/10.1016/j.biocon.2013.11.003>
- 545 Visser, M., Holleman, L., Gienapp, P., 2006. Shifts in caterpillar biomass phenology due to  
546 climate change and its impact on the breeding biology of an insectivorous bird. *Oecologia*  
547 147, 164–172. <https://doi.org/10.1007/s00442-005-0299-6>
- 548 Visser, M.E., te Marvelde, L., Lof, M.E., 2012. Adaptive phenological mismatches of birds and  
549 their food in a warming world. *J. Ornithol.* 153, S75–S84.  
550 <https://doi.org/10.1007/s10336-011-0770-6>
- 551 White, M.A., Nemani, R.R., Thornton, P.E., Running, S.W., 2002. Satellite evidence of  
552 phenological differences between urbanized and rural areas of the eastern United States  
553 deciduous broadleaf forest. *Ecosystems* 5, 260–273.

554 Wood, E.M., Kellermann, J.L., 2015. Phenological synchrony and bird migration : changing  
555 climate and seasonal resources in North America. CRC Press, Boca Raton.  
556
